# Supplementary material for: A low-dimensional N-rich coordination polymer as an effective fluorescence sensor for 2,4,6-trinitrophenol detection in an aqueous medium
Source: Royal Society of Chemistry journal article supplement (doi:10.1039/d1nj05748k), 2021-12-09
Supplement: d1nj05748k1.pdf [file d1nj05748k1.pdf]

## Supplementary information for

### **A low-dimensional N-rich coordination polymer as effective fluorescence sensor for 2,4,6-trinitrophenol detection in an aqueous medium**

Xu Han,<sup>a</sup> Jialin Tong,<sup>b</sup> Guanyu Ding,<sup>a</sup> Chunyi Sun,<sup>b</sup> Xinlong Wang,<sup>b</sup> Zhongmin Su,<sup>\*a</sup>  
Jing Sun,<sup>a</sup> Li-Li Wen,<sup>\*a</sup> Guo-Gang Shan<sup>\*b</sup>

<sup>a</sup>School of Chemical and Environmental Engineering, Changchun University of Science and Technology, Changchun, 130022, PR China.

E-mail: zmsu@nenu.edu.cn, wll@cust.edu.cn

<sup>b</sup>National & Local United Engineering Laboratory for Power Batteries, Key Laboratory of Polyoxometalate Science of Ministry of Education, Department of Chemistry, Northeast Normal University, Changchun 130024, China.

E-mail: shangg187@nenu.edu.cn

## Caption of Figure

|                                                                                                                                |            |
|--------------------------------------------------------------------------------------------------------------------------------|------------|
| <b>Figure S1.</b> In-coordination environment of <b>CUST-801</b> .....                                                         | <b>S8</b>  |
| <b>Figure S2.</b> Self-assembled 1D chain of <b>CUST-801</b> .....                                                             | <b>S8</b>  |
| <b>Figure S3.</b> Visible images of <b>CUST-801</b> .....                                                                      | <b>S9</b>  |
| <b>Figure S4.</b> Thermogravimetric analysis curve of <b>CUST-801</b> .....                                                    | <b>S9</b>  |
| <b>Figure S5.</b> Powder X-ray diffraction pattern and luminescence spectrum of <b>CUST-801</b> in 14 days with water.....     | <b>S10</b> |
| <b>Figure S6.</b> Powder X-ray diffraction patterns of <b>CUST-801</b> in different organic solvents .....                     | <b>S10</b> |
| <b>Figure S7.</b> Powder X-ray diffraction patterns of <b>CUST-801</b> after grinding .....                                    | <b>S11</b> |
| <b>Figure S8.</b> The solid-state excitation and emission spectra of free HTzPTpy.....                                         | <b>S11</b> |
| <b>Figure S9.</b> The excitation and emission spectra of <b>CUST-801</b> .....                                                 | <b>S12</b> |
| <b>Figure S10.</b> The solid-state peak of fluorescence emission of free HTzPTpy ligand and <b>CUST-801</b> .....              | <b>S12</b> |
| <b>Figure S11.</b> The solid-state peak position of the emission fluorescence spectrum of <b>CUST-801</b> after grinding ..... | <b>S13</b> |
| <b>Figure S12.</b> The solid-state and the liquid-state peak of fluorescence emission of <b>CUST-801</b> .....                 | <b>S13</b> |
| <b>Figure S13.</b> Lifetime decay profiles of <b>CUST-801</b> in water containing different amounts of TNP.....                | <b>S14</b> |
| <b>Figure S14.</b> Photoluminescence spectra of <b>CUST-801</b> in water containing different amounts of 2,4-NT.....           | <b>S14</b> |
| <b>Figure S15.</b> Photoluminescence spectra of <b>CUST-801</b> in water containing different amounts of m-DB .....            | <b>S15</b> |
| <b>Figure S16.</b> Photoluminescence spectra of <b>CUST-801</b> in water containing different amounts of p-NT.....             | <b>S15</b> |
| <b>Figure S17.</b> Photoluminescence spectra of <b>CUST-801</b> in water containing different amounts of NB.....               | <b>S16</b> |
| <b>Figure S18.</b> PXRD of <b>CUST-801</b> after recycling.....                                                                | <b>S16</b> |

**Figure S19.** HOMO and LUMO energy of NACs and ligands .....S17

**Figure S20.** The absorption spectra of difference NACs and emission spectra of  
**CUST-801** .....S19

**Caption of Table**

**Table S1.** Summary of crystallographic data for **CUST-801** .....S6

**Table S2.** Selected bond lengths (Å) for **CUST-801** .....S7

**Table S3.** Selected angles (°) for **CUST-801** .....S7

**Table S4.** The comparison of the quenching constants ( $K_{SV}$ ) and the detection limit  
with reported CPs for sensing TNP .....S18

**Table S5.** HOMO and LUMO energy levels of NACs and ligand .....S19

## Experimental section

### 1.1 Materials

Anhydrous  $\text{InCl}_3$  and all the nitroaromatics were obtained from Sinopharm Chemical Reagent Co., Ltd. China. 4-(tetrazol-5-yl) phenyl-[2,2':6',2'']terpyridine (HTzPTpy) for the synthesis were purchased from Tensus Biotech (Shanghai) Co. The purity of all reagents was of analytical grade and was used without further purification. Aqueous solutions were prepared with deionized water (18.2 M $\Omega$  cm) produced from a Milli-Q water purification system.

**Caution!** 2,4,6-trinitrophenol (TNP) possesses highly explosive and should be handled carefully and in small amounts.

### 1.2 Characterization

Powder X-ray diffraction (PXRD) patterns of the samples were recorded ranging from 5 to 50° at room temperature using a Siemens D5005 X-ray diffractometer with  $\text{Cu-K}\alpha$  radiation ( $\lambda = 1.5418 \text{ \AA}$ ). The FTIR spectrum was performed in the range of 4000-400  $\text{cm}^{-1}$  using KBr pellets on an Alpha Centauri FTIR spectrophotometer. The UV-Visible absorption spectra were obtained with a Shimadzu UV-3900 spectrophotometer. Thermogravimetry analysis (TGA) was performed on a Mettler Toledo DTG-60H System apparatus under Nitrogen flow (50  $\text{mL min}^{-1}$ ) at a heating rate of 5  $^\circ\text{C min}^{-1}$  up to 800  $^\circ\text{C}$ . Photoluminescence (PL) spectra are scanned on a photoluminescence spectrometer (Hitachi F-4600) under an excitation wavelength of 360 nm. Lifetime measurements were performed on Edinburgh Fluorescence Spectrometer (FLS920P).

X-ray single-crystal data collection of **CUST-801** was performed on a Bruker APEX II CCD diffractometer equipped with a graphite monochromator using Mo-K $\alpha$  radiation ( $\lambda=0.71073 \text{ \AA}$ ) at 245 K. A multiscan technique was applied to perform adsorption corrections. The structures were solved using the direct method and refined using the full-matrix least-squares method on F2 with anisotropic thermal parameters for all non-hydrogen atoms using the SHELXL-2014 program.<sup>1-3</sup> The crystallographic

data of **CUST-801** have been deposited in the Cambridge Crystallographic Data Center with CCDC 2115226.

### **Fluorescence experiments**

In the typical experimental setup, 3 mg of **CUST-801** was dispersed in 10 mL of deionized water. In a 1 cm quartz cuvette, 3 mL solution of **CUST-801** (0.9 mg/mL) was placed and the fluorescence response was measured in-situ after incremental addition of freshly prepared analyte solutions. The fluorescence response was measured in the range of 400-750 nm upon excitation at 380 nm while keeping a 5 nm slit width for both source and detector. To maintain homogeneity, the sample was sonicated and ground during the experiment.

*Formula for calculating the percentage of TNP fluorescence intensity quenching:*<sup>4</sup>

5

$$\frac{I_0 - I}{I_0} \times 100\%$$

Where,  $I_0$  = initial fluorescence intensity,

$I$  = intensity of **CUST-801** containing TNP solution.

**Stern-Volmer equation:**<sup>6</sup>

$$I_0/I = K_{SV}[M] + 1.$$

Where,  $I_0$  = fluorescent intensity of **CUST-801** before the addition of the analyte,

$I$  = fluorescent intensity after the addition of the respective analyte,

$K_{SV}$  = Stern-Volmer constant,

$[M]$  = molar concentration of the analyte ( $M^{-1}$ ).

**The limit of detection concentration (LOD) was calculated according to the formula:**<sup>7</sup>

$$LOD = 3\delta/K_{SV}.$$

$\delta$  is the standard deviation of the detection method.

**Table S1.** Crystal data and structure refinement for **CUST-801**

| CCDC                               | 2115226                                                          |
|------------------------------------|------------------------------------------------------------------|
| Empirical formula                  | C <sub>22</sub> H <sub>14</sub> Cl <sub>2</sub> InN <sub>7</sub> |
| Formula weight                     | 562.12                                                           |
| Temperature /K                     | 244.64                                                           |
| Crystal system                     | monoclinic                                                       |
| Space group                        | P2 <sub>1</sub> /n                                               |
| a /Å                               | 9.1353(15)                                                       |
| b /Å                               | 19.683(3)                                                        |
| c /Å                               | 11.535(2)                                                        |
| α /°                               | 90                                                               |
| β /°                               | 93.588(7)                                                        |
| γ /°                               | 90                                                               |
| Volume/Å <sup>3</sup>              | 2070.0 (6)                                                       |
| Z                                  | 4                                                                |
| ρ <sub>calc</sub> /cm <sup>3</sup> | 1.804                                                            |
| Radiation                          | Mo Kα (λ = 0.71073)                                              |
| Independent reflections            | 3661 [R <sub>int</sub> = 0.0409, R <sub>sigma</sub> = 0.0219]    |
| 2θ range for data /°               | 4.924 to 50.174                                                  |
| Goodness-of-fit on F <sup>2</sup>  | 1.259                                                            |
| Final R indexes [I ≥ 2σ (I)]       | 0.0242                                                           |
| Final R indexes [all data]         | 0.0799                                                           |

<sup>a</sup>R<sub>1</sub> =  $\sum ||F_o| - |F_c|| / \sum |F_o|$ . <sup>b</sup>wR<sub>2</sub> =  $\{[\sum w (F_o^2 - F_c^2)^2] / \sum [w (F_o^2)^2]\}^{1/2}$

**Table S2.** Bond Lengths for CUST-801

| Atom             | Atom            | Length      |
|------------------|-----------------|-------------|
| In1              | C11             | 2.4618 (11) |
| In1              | C12             | 2.4038 (9)  |
| In1              | N1              | 2.236 (2)   |
| In1              | N2              | 2.265 (2)   |
| In1              | N3 <sup>1</sup> | 2.297 (3)   |
| In1              | N4              | 2.292 (3)   |
| In1 <sup>2</sup> | N3              | 2.297 (3)   |
| C1               | C4              | 1.495 (4)   |
| N6               | N7              | 1.362 (4)   |

<sup>1</sup>3/2-X,-1/2+Y,3/2-Z; <sup>2</sup>3/2-X,1/2+Y,3/2-Z
**Table S3.** Bond Angles for CUST-801

| Atom | Atom | Atom             | Angle       | Atom            | Atom | Atom | Angle       |
|------|------|------------------|-------------|-----------------|------|------|-------------|
| C12  | In1  | C11              | 92.71 (4)   | N2              | In1  | N4   | 143.98 (9)  |
| N1   | In1  | C11              | 92.13 (7)   | N3 <sup>1</sup> | In1  | C11  | 173.70 (6)  |
| N1   | In1  | C12              | 174.08 (7)  | N3 <sup>1</sup> | In1  | C12  | 93.45 (7)   |
| N1   | In1  | N2               | 71.99 (8)   | N4              | In1  | C11  | 90.56 (8)   |
| N1   | In1  | N3 <sup>1</sup>  | 81.81 (9)   | N4              | In1  | C12  | 111.34 (7)  |
| N1   | In1  | N4               | 72.02 (9)   | N3 <sup>1</sup> | In1  | N4   | 85.97 (10)  |
| N2   | In1  | C11              | 92.14 (7)   | C1              | N1   | In1  | 119.31 (18) |
| N2   | In1  | C12              | 104.40 (7)  | C1              | N1   | C7   | 120.9 (2)   |
| N2   | In1  | N3 <sup>1</sup>  | 87.61 (9)   | C7              | N1   | In1  | 119.73 (19) |
| C4   | N2   | In1              | 117.64 (19) | C12             | N4   | In1  | 116.57 (19) |
| N5   | N3   | In1 <sup>2</sup> | 113.8 (2)   | C20             | N4   | In1  | 124.6 (2)   |
| C18  | N3   | In1 <sup>2</sup> | 135.9 (2)   | C3              | C1   | C4   | 124.2 (3)   |

<sup>1</sup>3/2-X,-1/2+Y,3/2-Z; <sup>2</sup>3/2-X,1/2+Y,3/2-Z

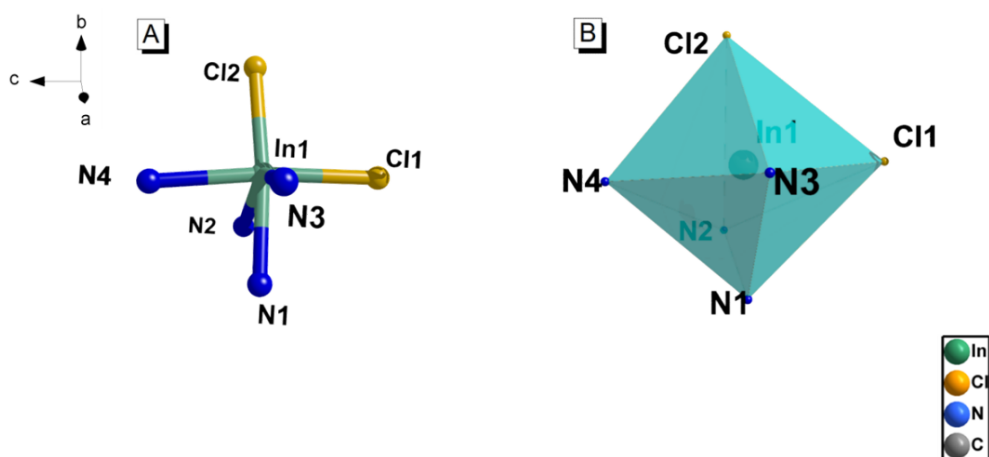

**Figure S1.** Co-ordination environment around the In (III) center. Color code: Indium (sea green), Chlorine (light orange), Nitrogen (blue), Carbon (grey). (Hydrogen atoms are omitted for clarity).

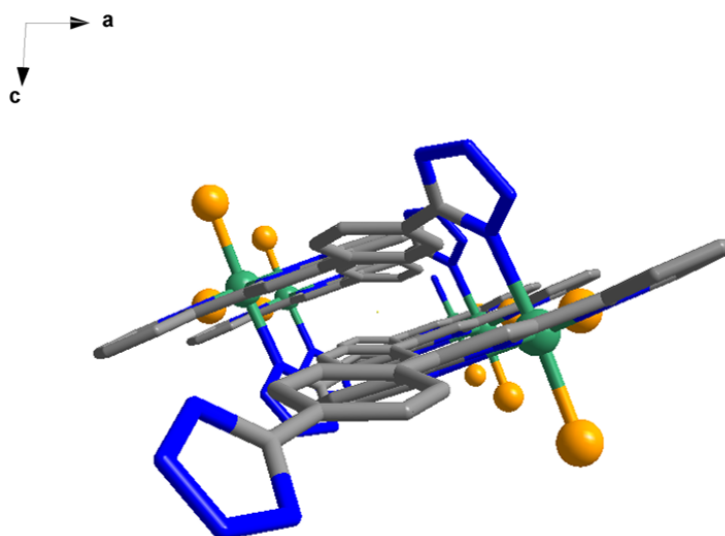

**Figure S2.** View of the b axis. Color code: same as Figure S1.



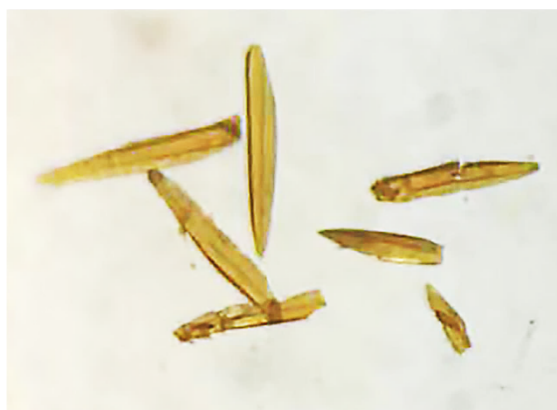

**Figure S3.** Visible images of CUST-801 crystals.

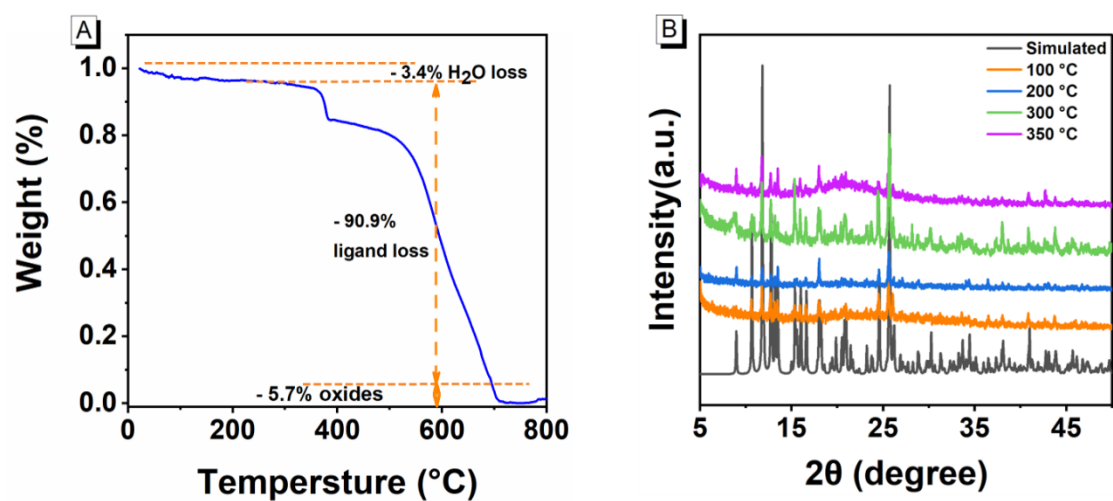

**Figure S4.** (A) Thermogravimetric analysis curve of CUST-801. (B) Simulated and experimental powder X-ray diffraction patterns (PXRD) patterns of CUST-801 are heated at 200 °C, 300 °C, 350 °C.

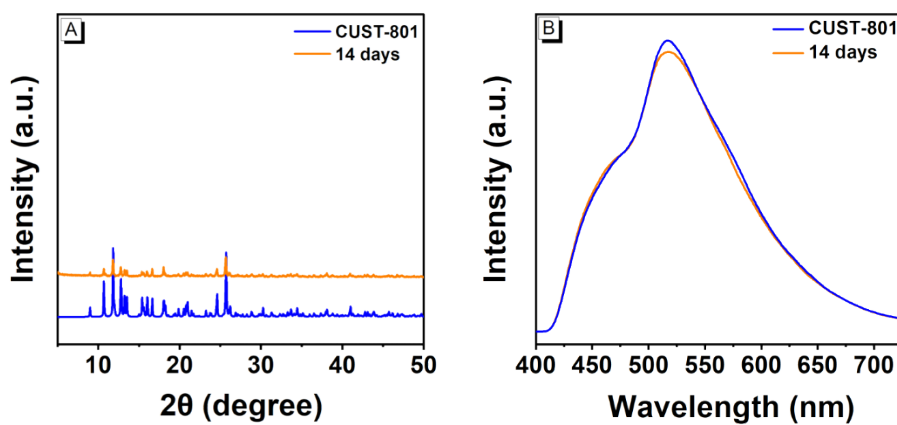

**Figure S5.** (A) Powder X-ray diffraction pattern of **CUST-801** in 14 days with water. (B) Luminescence spectrum of **CUST-801** and after storage in water for 14 days.

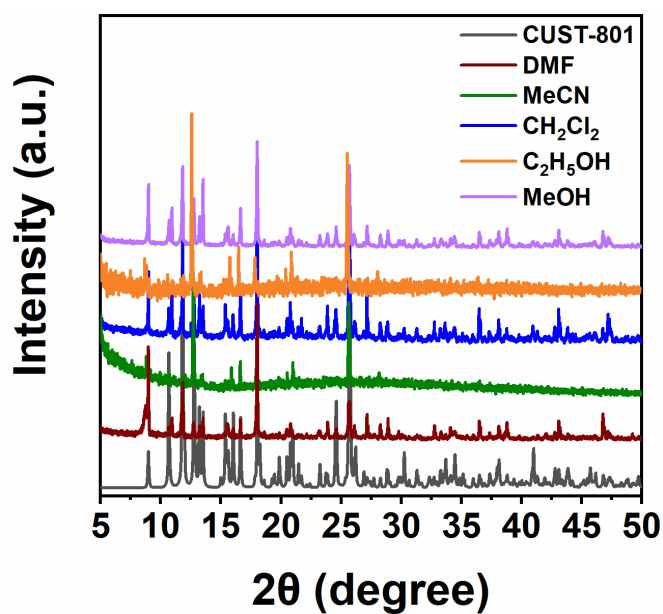

**Figure S6.** Powder X-ray diffraction patterns of **CUST-801** in different organic solvents.

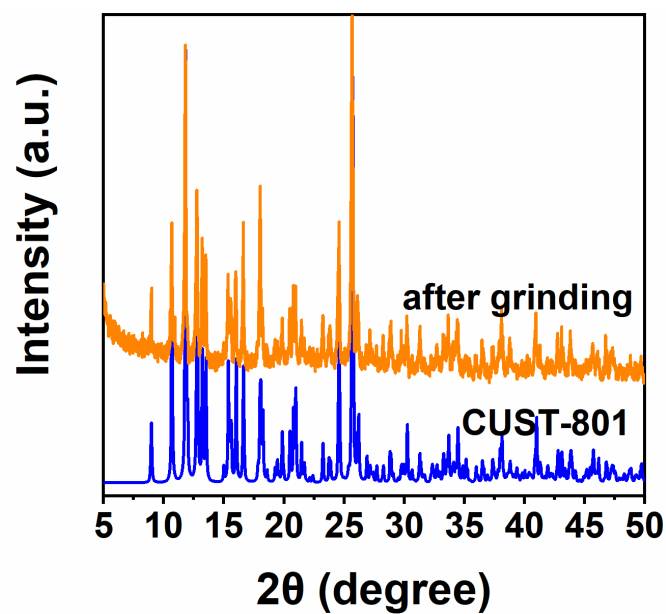

**Figure S7.** Powder X-ray diffraction patterns of CUST-801 after grinding.

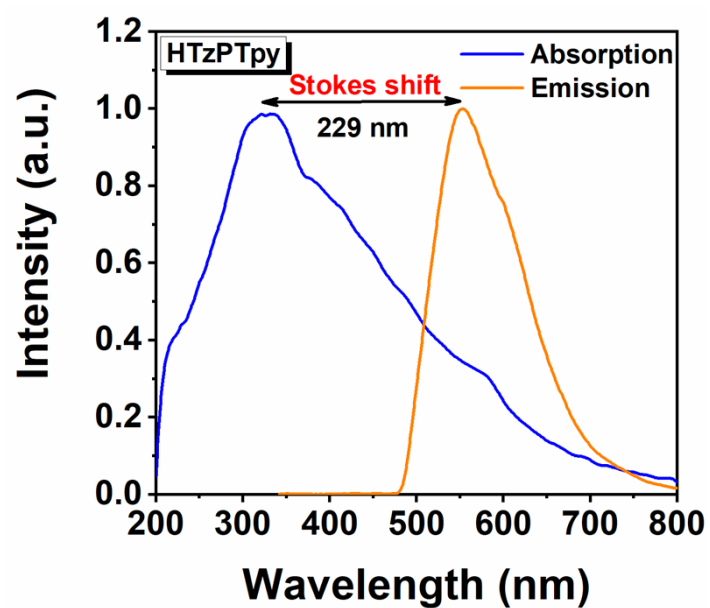

**Figure S8.** The solid-state excitation and emission spectra of free HTzPTpy ligand.

( $\lambda_{\text{ex}} = 324 \text{ nm}$ ;  $\lambda_{\text{em}} = 553 \text{ nm}$ ).

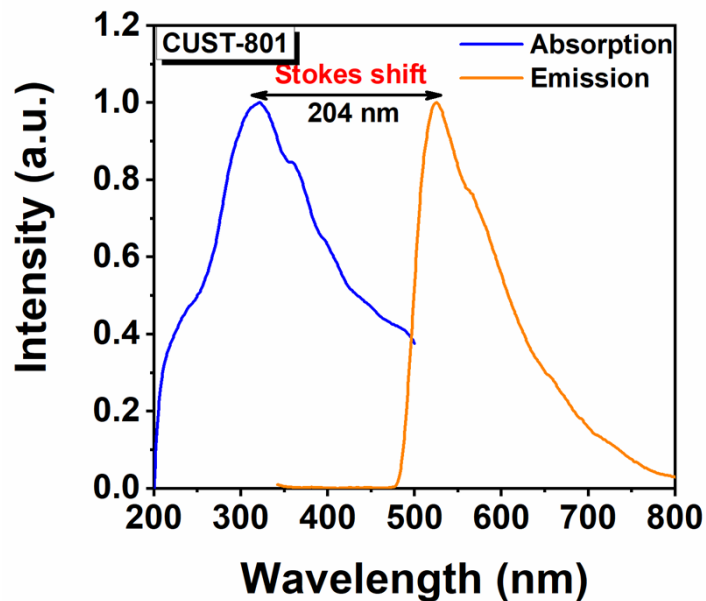

**Figure S9.** The solid-state excitation and emission spectra of **CUST-801**. ( $\lambda_{\text{ex}} = 320$  nm;  $\lambda_{\text{em}} = 524$  nm).

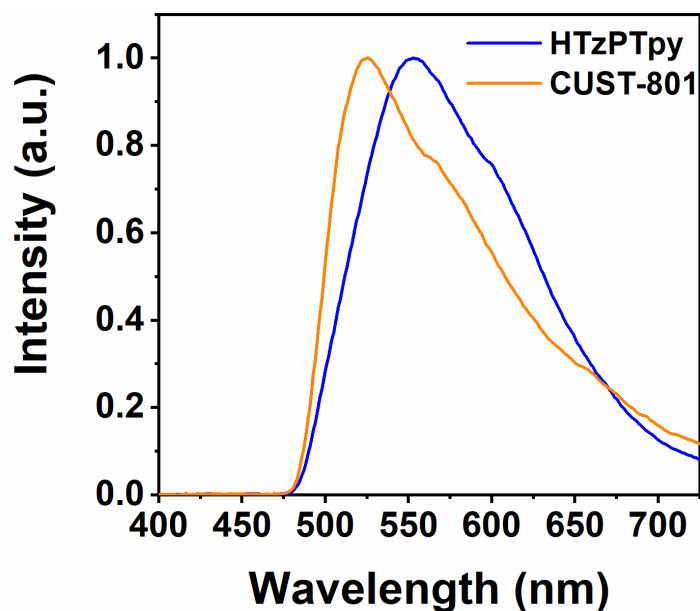

**Figure S10.** The solid-state peak of fluorescence emission of free **HTzPTpy** ligand and **CUST-801** ( $\lambda_{\text{ex}} = 320$  nm).

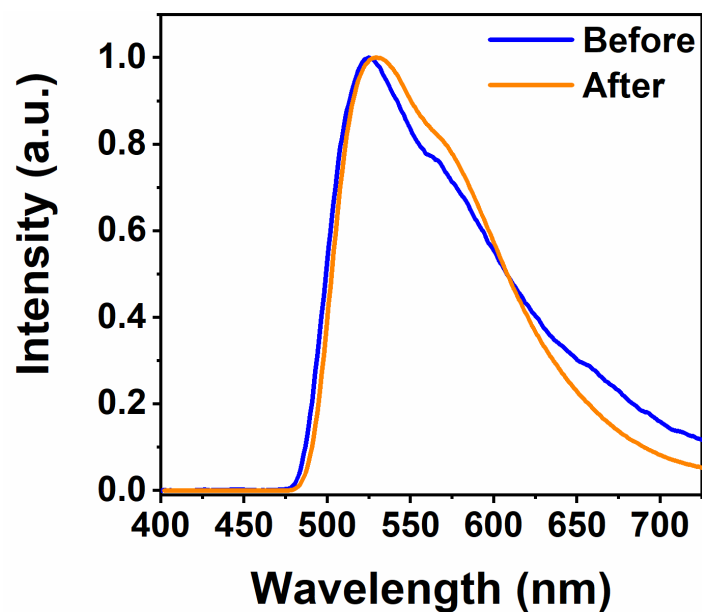

**Figure S11.** The solid-state peak position of the emission fluorescence spectrum of CUST-801 after grinding treatment ( $\lambda_{\text{ex}} = 320$  nm).

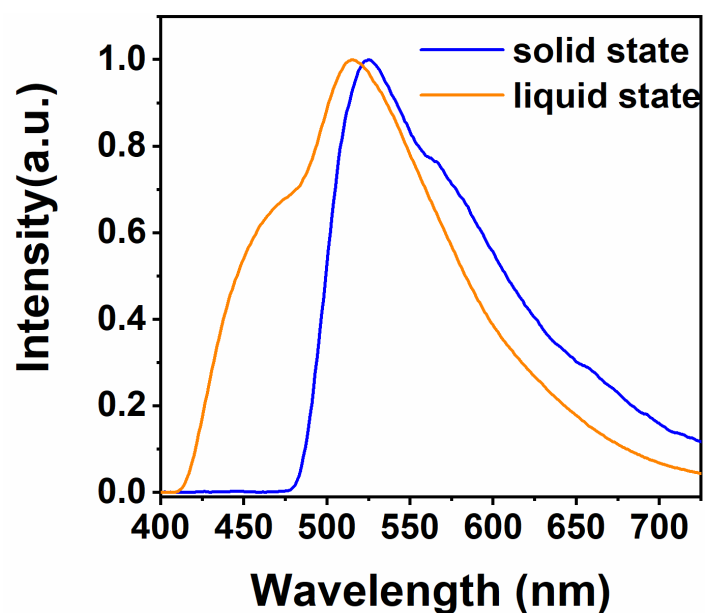

**Figure S12.** The solid-state and the liquid-state peak of fluorescence emission for CUST-801 (solid:  $\lambda_{\text{ex}} = 320$  nm, liquid:  $\lambda_{\text{ex}} = 380$  nm).

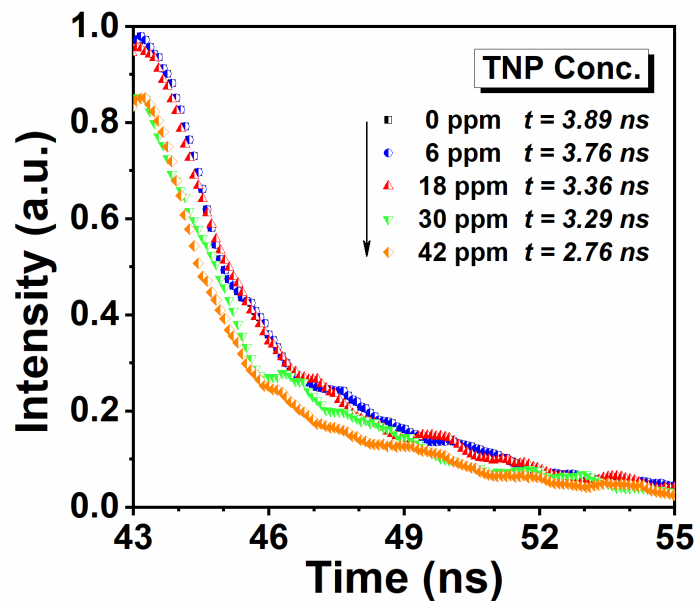

**Figure S13.** Lifetime decay profiles of CUST-801 in water containing different amounts of TNP (from 0 to 42 ppm).

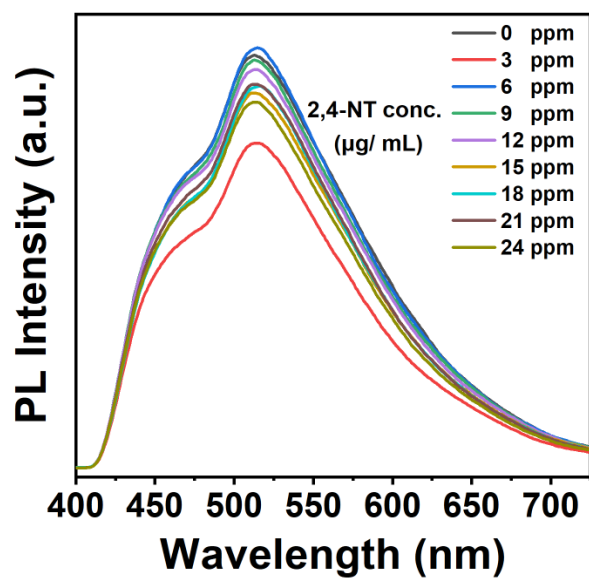

**Figure S14.** Photoluminescence spectra of CUST-801 in water containing different amounts of 2,4-NT ( $\lambda_{\text{ex}} = 380$  nm).

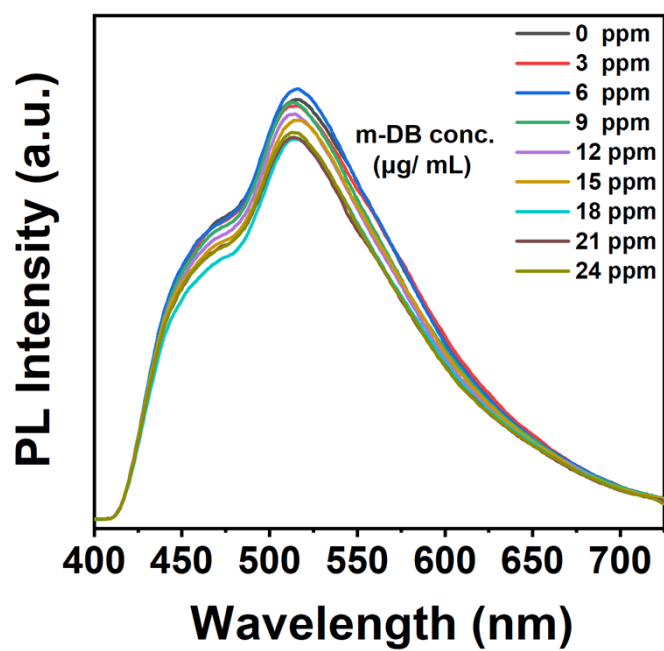

**Figure S15.** Photoluminescence spectra of CUST-801 in water containing different amounts of m-DB ( $\lambda_{\text{ex}} = 380 \text{ nm}$ ).

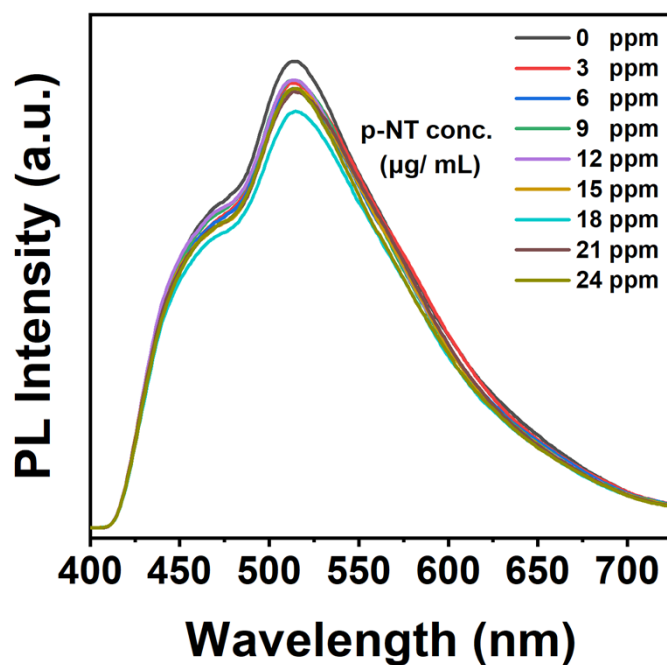

**Figure S16.** Photoluminescence spectra of CUST-801 in water containing different amounts of p-NT ( $\lambda_{\text{ex}} = 380 \text{ nm}$ ).

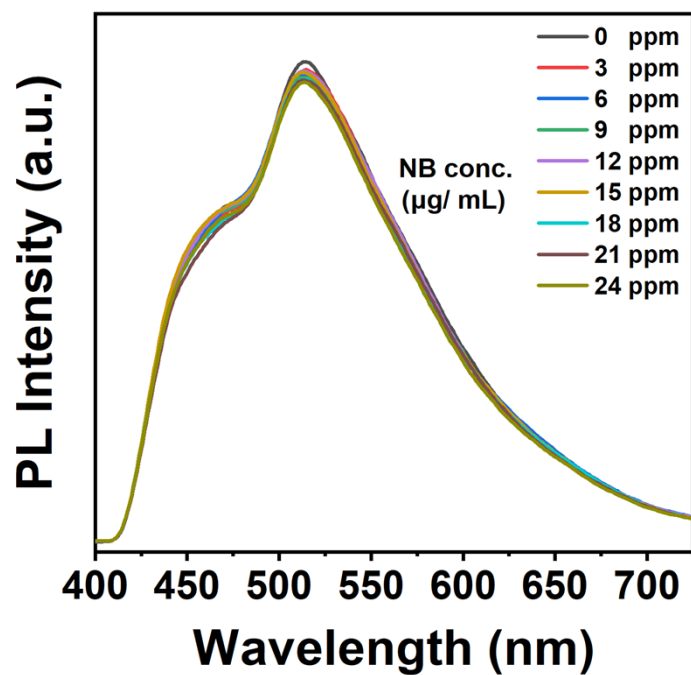

**Figure S17.** Photoluminescence spectra of CUST-801 in water containing different amounts of NB ( $\lambda_{\text{ex}} = 380$  nm).

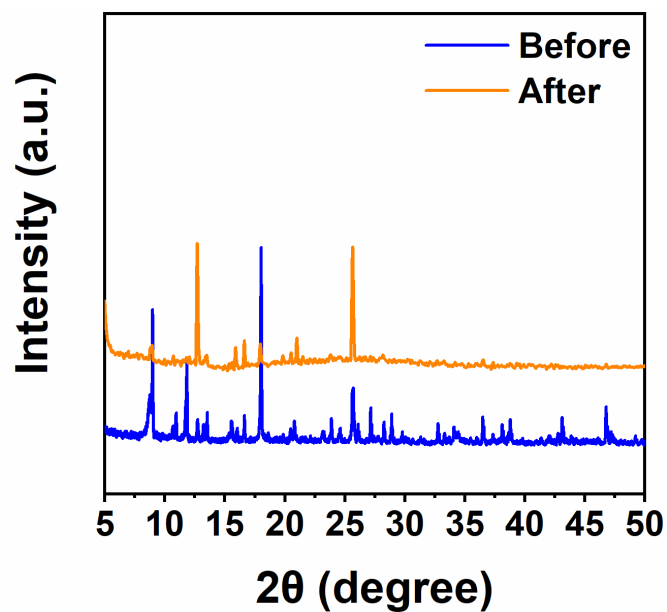

**Figure S18.** Powder X-ray diffraction pattern of CUST-801 after recycling.



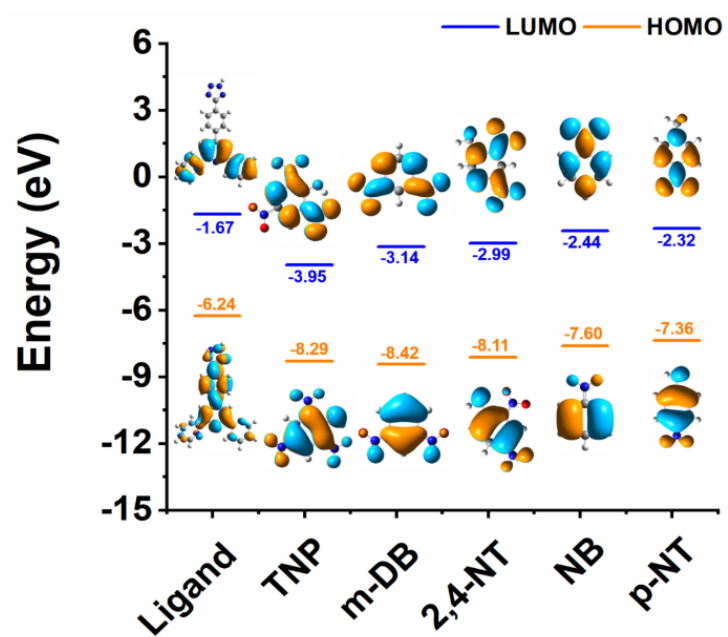

Figure S19. LUMO and HOMO energy of NACs and ligands.

**Table S4.** The comparison of the quenching constants ( $K_{SV}$ ) and the detection limit with reported CPs for sensing TNP.

| Molecular Formula                                | ( $K_{SV}/M^{-1}$ ) | Detection Limit         | solvent | Ref.             |
|--------------------------------------------------|---------------------|-------------------------|---------|------------------|
| <b>CUST-801</b>                                  | $8.95 \times 10^4$  | 1.34 $\mu$ M (0.3 ppm)  | Water   | <b>This work</b> |
| $(CH_3)_2NH_2][Cd(1245-BTC)_{0.5}(3S-TRZ)$       | $1.0 \times 10^4$   | 23.6 $\mu$ M            | DMF     | [8]              |
| $[Zn_2(tpbn)(2,6-NDC)_2]n$                       | $5.907 \times 10^3$ | 47.54 $\mu$ M           | water   | [9]              |
| $[[Zn_2(tpbn)(2,6-NDC)_2] \cdot 4H_2O]n$         | $2.464 \times 10^3$ | 82.11 $\mu$ M           | water   | [9]              |
| $[ZnL1(2,6-BIP)] \cdot 2H_2O \cdot DMF$          | $1.48 \times 10^4$  | 4.05 $\mu$ M (0.84 ppm) | DMF     | [10]             |
| $[CdL1(2,6-BIP)] \cdot 2H_2O \cdot DMF$          | $1.44 \times 10^4$  | 3.94 $\mu$ M            | DMF     | [10]             |
| $[Zn_2L2(2,6-BIP)] \cdot DMF$                    | $5 \times 10^4$     | 1.16 $\mu$ M (260 ppb)  | DMF     | [10]             |
| $[CdL2(2,6-BIP)] \cdot DMF$                      | $5.31 \times 10^4$  | 1.1 $\mu$ M             | DMF     | [10]             |
| $[Zr_6O_4(OH)_4(BTDB)_6] \cdot 8H_2O \cdot 6DMF$ | $2.49 \times 10^4$  | 1.63 $\mu$ M            | MeOH    | [11]             |
| $[Cd(INA)(pytpy)(OH) \cdot 2H_2O]n$              | $3.3 \times 10^4$   | 9.1 $\mu$ M             | water   | [12]             |
| $Zn_2(H_2L)_2(Bpy)_2(H_2O)_3 \cdot H_2O$         | $1.36 \times 10^4$  | 0.49 $\mu$ M            | water   | [13]             |
| $[Zn(L)(HCOO) \cdot H_2O]n$                      | $2.11 \times 10^4$  | -                       | water   | [14]             |
| $[Zn_4(DMF)(Ur)_2(NDC)_4]n$                      | $1.083 \times 10^5$ | 7.1 $\mu$ M             | water   | [15]             |
| $Zr_6O_4(OH)_4(L)_6$                             | $2.9 \times 10^4$   | 2.6 $\mu$ M             | water   | [16]             |
| $[Eu_3(bpydb)_3(HCOO)(\mu_3-OH)_2(H)]$           | $2.1 \times 10^4$   | -                       | water   | [17]             |

Some probe for adsorption and detection in water or wastewater

| Probes                 | Analytes       | solvent     | Ref.             |
|------------------------|----------------|-------------|------------------|
| <b>CUST-801</b>        | TNP            | water       | <b>This work</b> |
| SiO <sub>2</sub> -HMBA | Ce             | wastewater  | [18]             |
| AcDB20C6               | Cs             | water       | [19]             |
| Ni-Si-MgO/CNTs         | H <sub>2</sub> | water       | [20]             |
| -                      | Ni             | water       | [21]             |
| Bio-slag               | Cs             | wasterwater | [22]             |

**Table S5.** HOMO and LUMO energy levels of selected NACs and ligand.

| Analytes | HOMO (eV) | LUMO (eV) | Band gap (eV) |
|----------|-----------|-----------|---------------|
| TNP      | -8.288593 | -3.951448 | 4.337145      |
| 2,4-NT   | -8.112495 | -2.989093 | 5.123402      |
| m-DB     | -8.41705  | -3.140347 | 5.276703      |
| NB       | -7.600974 | -2.436778 | 5.164196      |
| p-NT     | -7.362160 | -2.320531 | 5.041628      |

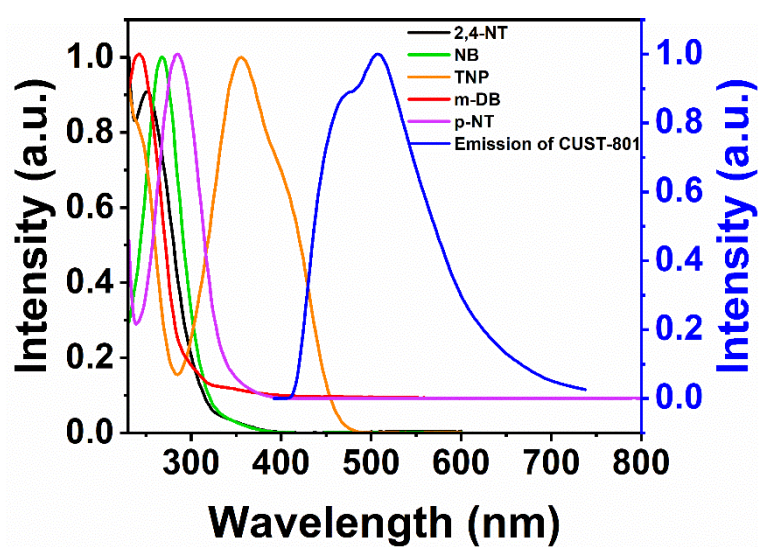

**Figure S20.** The absorption spectra of difference NACs and emission spectra of CUST-801.

## References

1. Y. Gong, C. Qin, Y. T. Zhang, C. Y. Sun, Q. H. Pan, X. L. Wang and Z. M. Su, *Angew. Chem. Int. Ed.*, 2020, **59**, 22034-22038.
2. H. M. Gan, N. Xu, C. Qin, C. Y. Sun, X. L. Wang and Z. M. Su, *Nat. Comm.*, 2020, **11**, 1-8.
3. a) G. M. Sheldrick, *Acta Crystallogr. A*, 2008, **64**, 112. b) G. M. Sheldrick, *Acta Crystallogr. C*, 2015, **71**, 3-8.
4. X. G. Hou, W. Yong, H. T. Cao, H. Z. Sun, H. B. Li, G. G. Shan and Z. M. Su, *Chem. Comm.*, 2014, **50**, 6031-6034.
5. Ming Y, Hai H, Peng F, Z. M. Su, X. Li, X. L. Hu, F. W. Gao and Q. Q. Pan. *Dyes Pigm.*, 2020, **185**. 1008825-10088434.
6. S. S. Nagarkar, B. Joarder, A. K. Chaudhari, S. Mukherjee and S. K. Ghosh, *Angew. Chem., Int. Ed.*, 2013, **52**, 2881-2885.
7. W. L. Che, G. F. Li, X. M. Liu, K. Z. Shao, D. X. Zhu, Z. M. Su and M. R. Bryce, *Chem. Commun.*, 2018, **54**, 1730-1733.
8. H. T. Wu, H. P. Li, S. N. Li, Y. C. Jiang, M. C. Hu and Q. G. Zhai, *J. Solid State Chem.*, 2020, **283**, 121166-121174.
9. G. Chakraborty and S. K. Mandal, *Inorg. Chem.*, 2017, **56**, 14556-14566.
10. D. Wang, Z. Y. Hu, S. S. Xu, D. D. Li, Q. Zhang, W. Ma, H. P. Zhou, J. Y. Wu and Y. P. Tian, *Dalton Trans.*, 2019, **48**, 1900-1905.
11. S. K. Mostakim and S. Biswas, *Cryst. Eng. Comm.*, 2016, **18**, 3104-3113.
12. J. F. Zhang, J. J. Wu, G. D. Tang, J. Y. Feng, F. M. Luo, B. Xu and C. Zhang, *Sens. Actuators B Chem.*, 2018, **272**, 166-174.
13. Y. J. Deng, N. J. Chen, Q. Y. Li, X. J. Wu, X. L. Huang, Z. H. Lin and Y. G. Zhao, *Cryst. Growth Des.*, 2017, **17**, 3170-3177.
14. Y. Yang, K. Shen, J. Z. Lin, Y. Zhou, Q. Y. Liu, C. Hang, H. N. Abdelhamid, Z. Q. Zhang and H. Chen, *RSC Adv.*, 2016, **6**, 45475-45481.
15. S. Mukherjee, A. V. Desai, B. Manna, A. I. Inamdar and S. K. Ghosh, *Cryst. Growth Des.*, 2015, **15**, 4627-4634.

16. S. S. Nagarkar, A. V. Desai and S. K. Ghosh, *Chem. Commun.*, 2014, **50**, 8915-8918.
17. X. Z. Song, S. Y. Song, S. N. Zhao, Z. M. Hao, M. Zhu, X. Meng, L. L. Wu and H. J. Zhang, *Adv. Funct. Mater.*, 2014, **24**, 4034-4041.
18. K. T. Kubra, M. S. Salman, M. N. Hasan, A. Islam, S. H. Teo, M. M. Hasan, M. C. Sheikh and M. R. Awual, *J. M. Liq.*, 2021, 338, 116667-116677.
19. M. R. Awual, T. Yaita, T. Kobayashi, H. Shiwaku and S. Suzuki, *J. Environ. Chem. Eng.*, 2020, 8, 103684-103693.
20. A. Islam, S. H. Teo, M. R. Awual, Y. Hin and T. Yap, *J. Clean. Prod.*, 2019, 238, 117887-117897.
21. M. A. Islam, M. R. Awual and M. J. Angove, *J. Environ. Chem. Eng.*, 2019, 7, 103305-103321.
22. S. Khandaker, Y. Toyohara, G. C. Saha, M. R. Awual and T. Kuba, *J. WaterProcess Eng.*, 2020, 33, 101055-101064.
